# Supplementary material for: Design, synthesis and antimicrobial evaluation of dihydropyrimidone based organic–inorganic nano-hybrids
Source: Royal Society of Chemistry journal article supplement (doi:10.1039/c5ra08765a), 2015-01-01
Supplement: c5ra08765a1.pdf [file c5ra08765a1.pdf]

## Supporting Information

# Design, Synthesis and Antimicrobial Evaluation of Dihydropyrimidone based Organic-inorganic Nano-hybrids

Tilak Raja<sup>a</sup>, BeantKaur<sup>b</sup>, NavneetKaur<sup>b,\*</sup> and NarinderSingh<sup>a,\*</sup>

<sup>a</sup>Department of Chemistry, Indian Institute of Technology Ropar (IIT Ropar), Rupnagar, Panjab, India, 140001;

<sup>b</sup>Centre for Nanoscience and Nanotechnology (UIEAST), Panjab University, Chandigarh, India, 160014.

\* Corresponding authors: E-mail address: nsingh@iitrpr.ac.in; Tel.: +91 1881242176

[navneetkaur@pu.ac.in](mailto:navneetkaur@pu.ac.in); Tel: +919815245098

### Contents

1. Experimental: Cytotoxic activity
2. <sup>1</sup>H NMR of Compound **4e**
3. <sup>13</sup>C NMR of Compound **4e**
4. Mass spectra of compound **4e**
5. IR spectra of compound **4a**
6. IR spectra of compound Ag@**4a**
7. IR spectra of compound Cu@**4a**
8. IR spectra of compound Au@**4a**
9. XRD spectra of compound Ag@**4a**
10. XRD spectra of compound Cu@**4a**
11. XRD spectra of compound Au@**4a**
12. TGA spectra of compound Ag@**4a**
13. TGA spectra of compound Cu@**4a**
14. TGA spectra of compound Au@**4a**

## **Experimental**

### **Cytotoxic Activity**

The cytotoxicity of **Ag@4b**, **Cu@4b** and **Au@4c** was determined through MTT assay, using HeLa cells seeded in a 96-well flat-bottomed microplate in growth medium (100  $\mu$ L) and incubated at 37 °C under a 5 % CO<sub>2</sub> atmosphere for 24 h. All test compound and blank analysis were performed and 10  $\mu$ L of MTT in PBS was added to each well. The microplate was incubated at 37 °C under a 5 % CO<sub>2</sub> atmosphere for another 3 h. The medium was then removed, and DMSO (100  $\mu$ L) was added to each well. The absorbance spectrum of each solution was measured at 570 nm. The dose dependent cytotoxicity of **Ag@4b**, **Cu@4b** and **Au@4c** was determined using different concentrations of given organic-inorganic nanoaggregates using the above mentioned conditions.

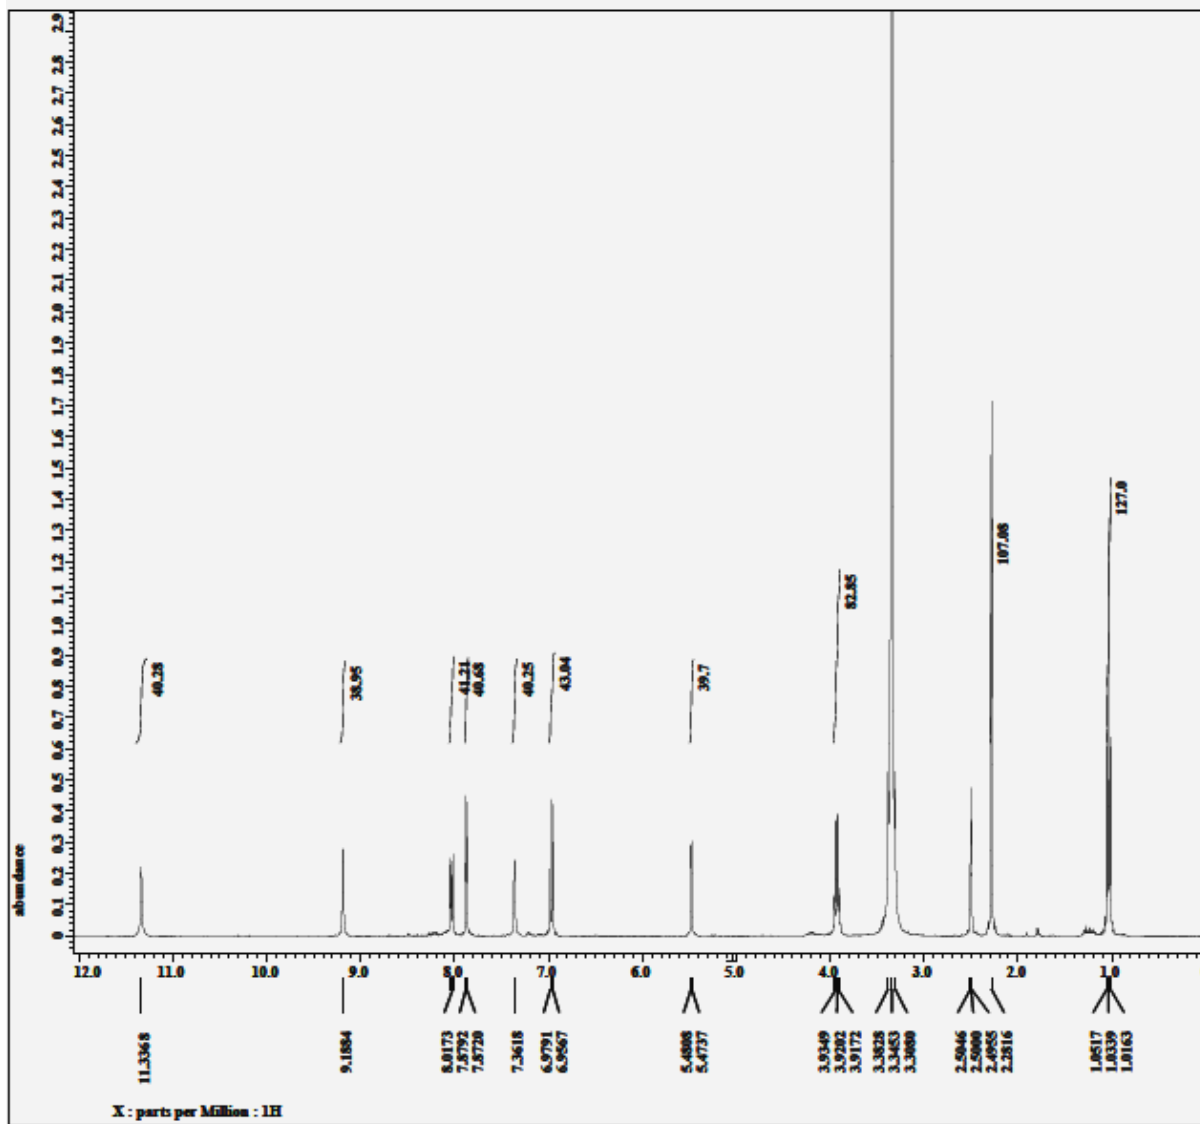

Figure 1S: <sup>1</sup>H NMR of Compound 4e

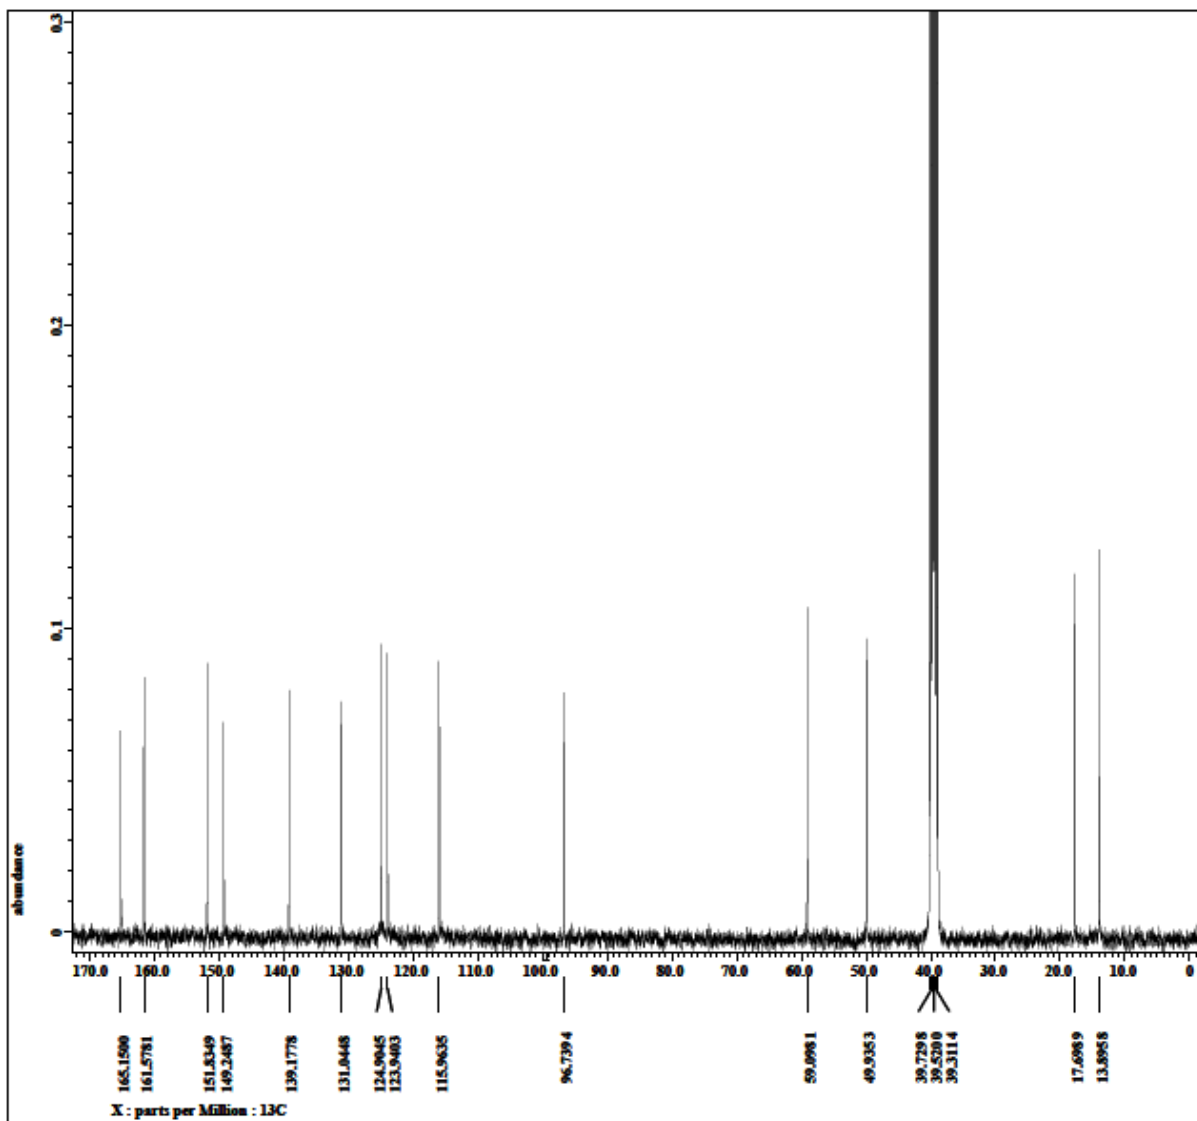

Figure 2S: <sup>13</sup>C NMR of Compound 4e

Line#: 1 R.Time: 2.687(Scan#: 507)  
MassPeaks: 297  
RawMode: Averaged 2.683-2.690(506-508) BasePeak: 183(206145)  
BG Mode: Calc. from Peak Group 1 - Event 1

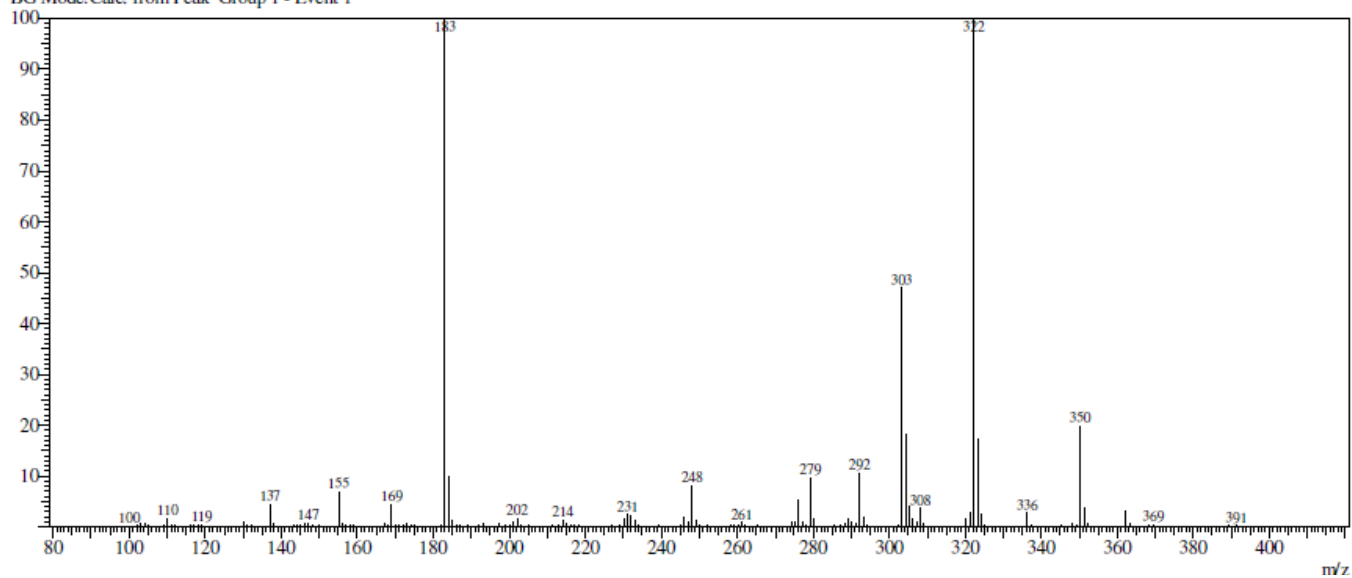

**Figure 3S:** Mass spectra of compound **4e**

RC SAIF PU, Chandigarh

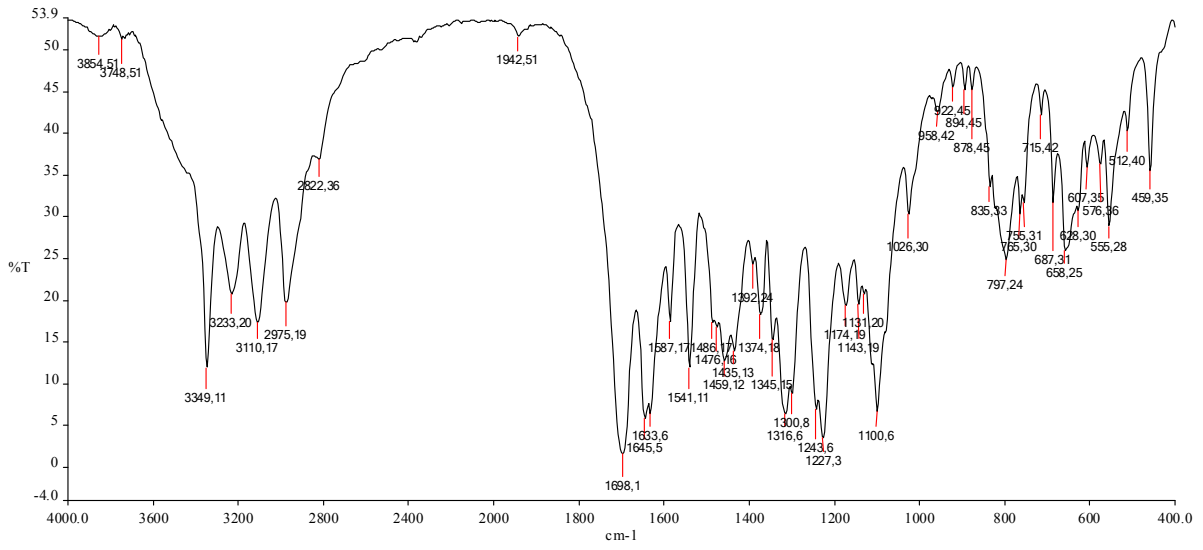

Figure 4S: FTIR of compound 4a

RC SAIF PU, Chandigarh

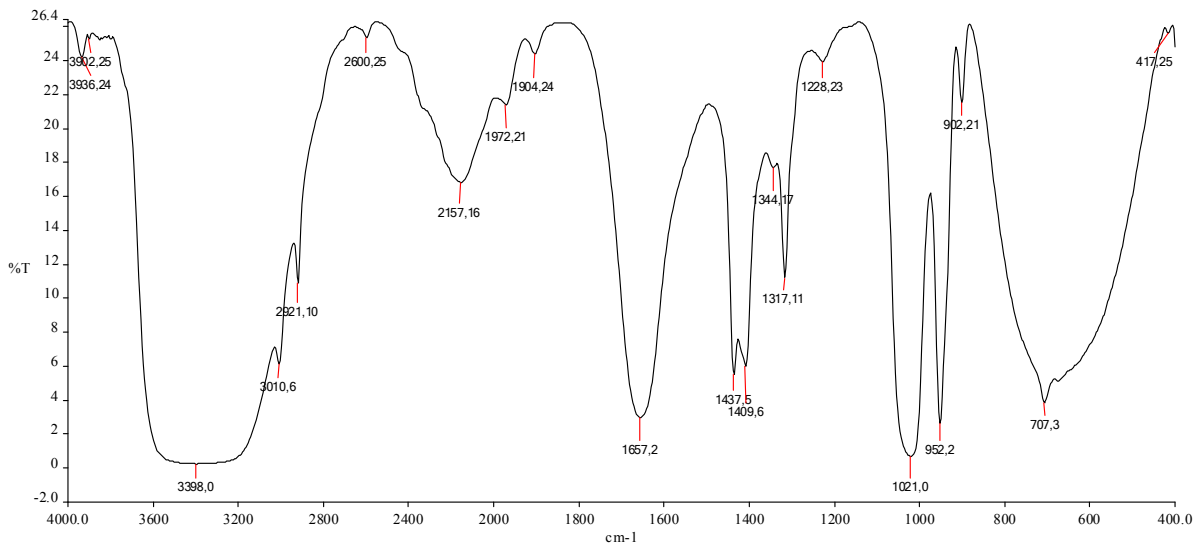

Figure 5S: FTIR of compound Ag@4a

RC SAIF PU, Chandigarh

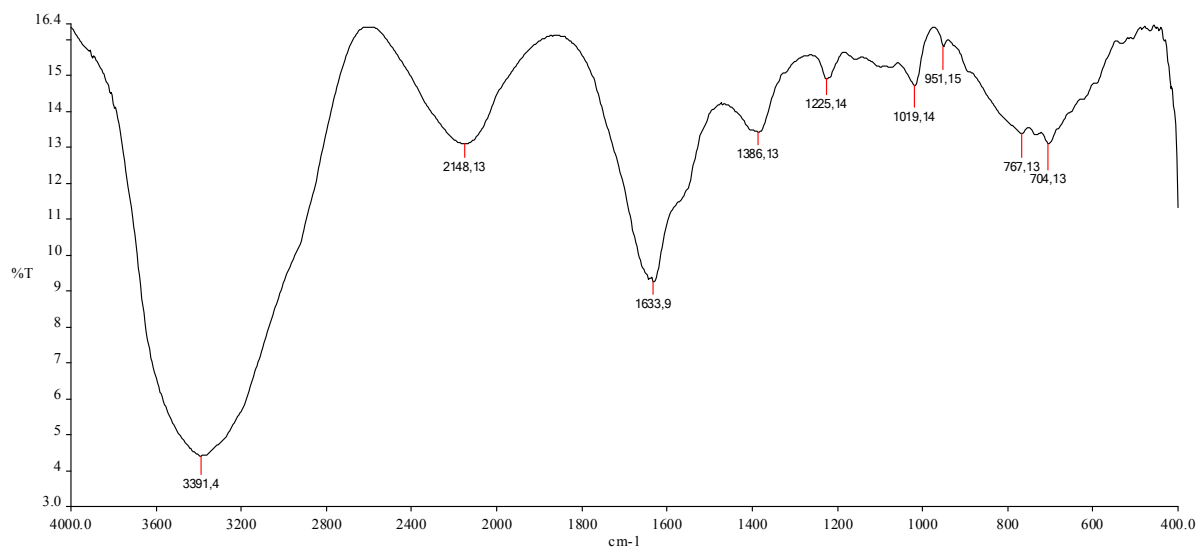

Figure 6S: FTIR of compound Cu@4a

RC SAIF PU, Chandigarh

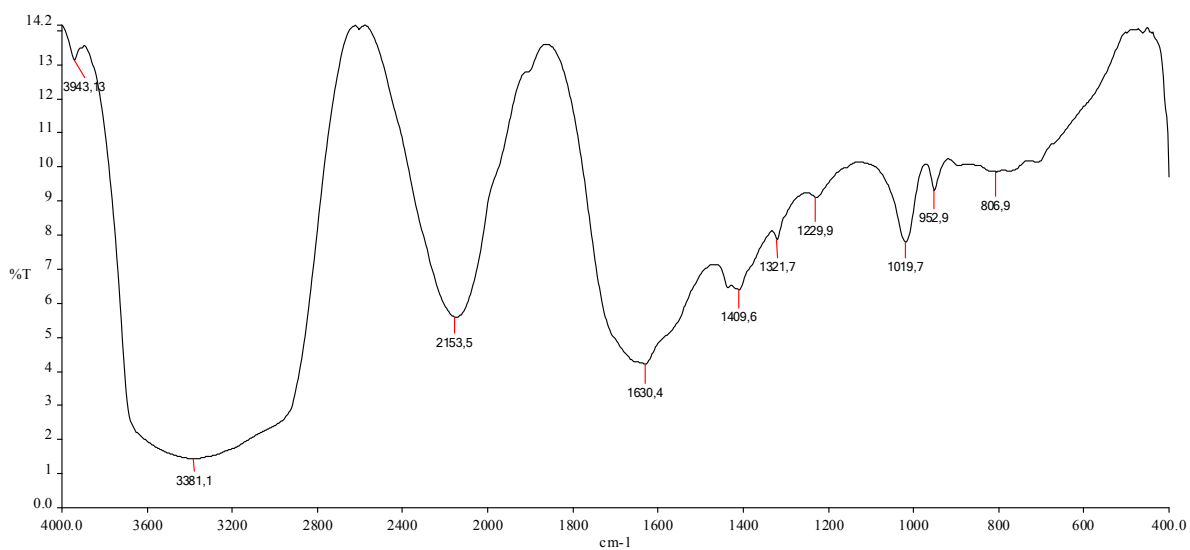

Figure 7S: FTIR of compound Au@4a

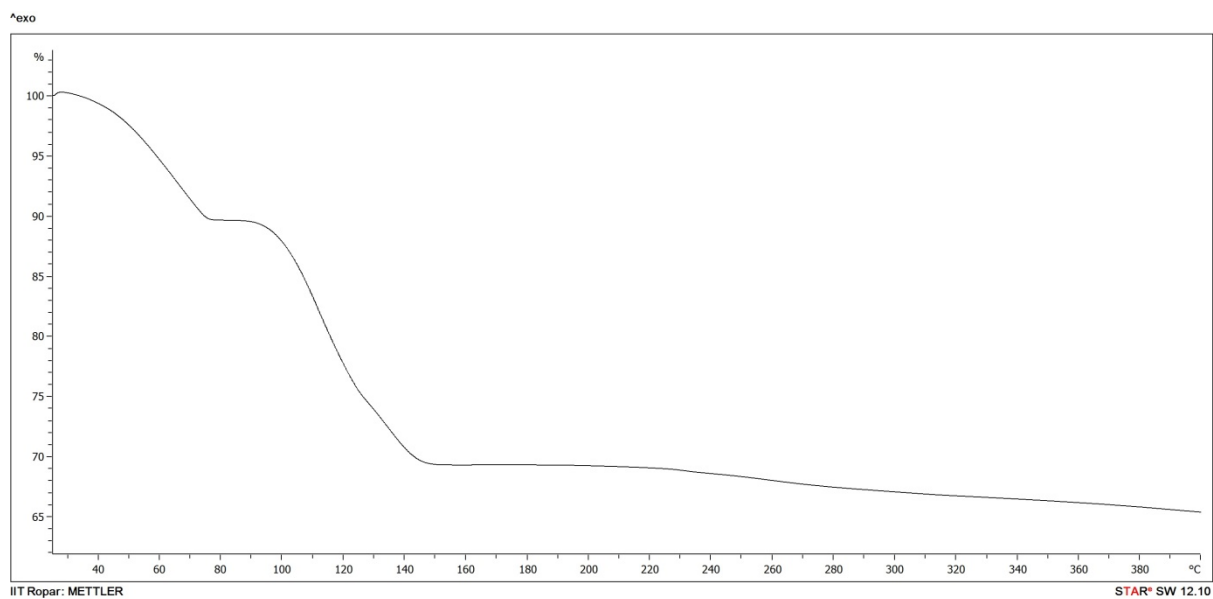

**Figure 8S:** TGA of compound Ag@4a

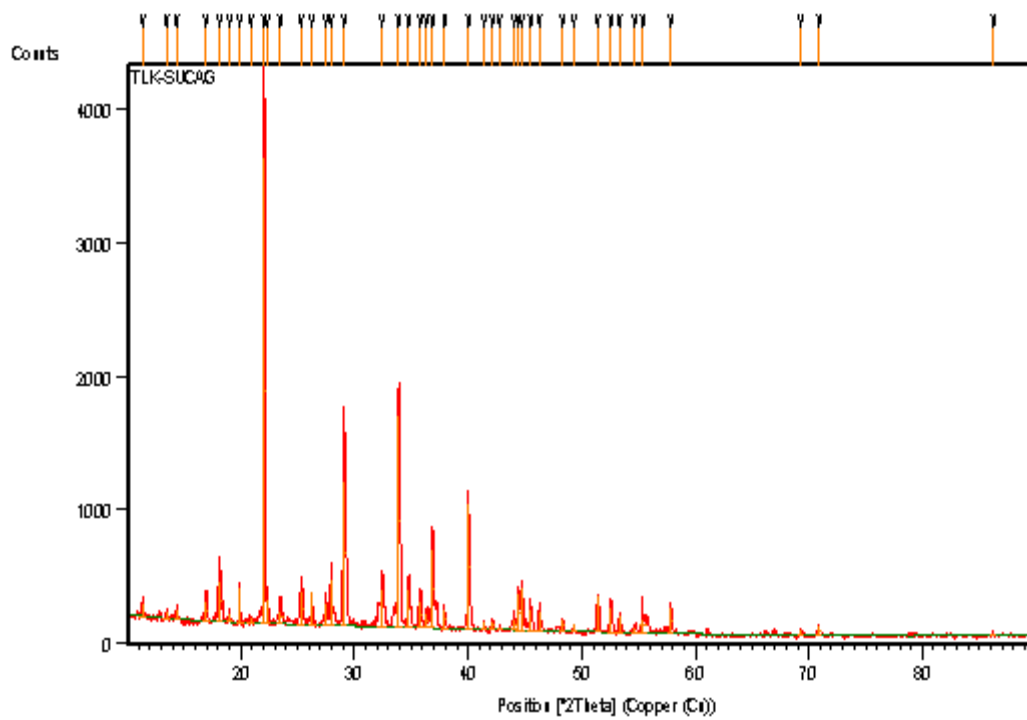

**Figure 9S:** XRD of compound Ag@4a



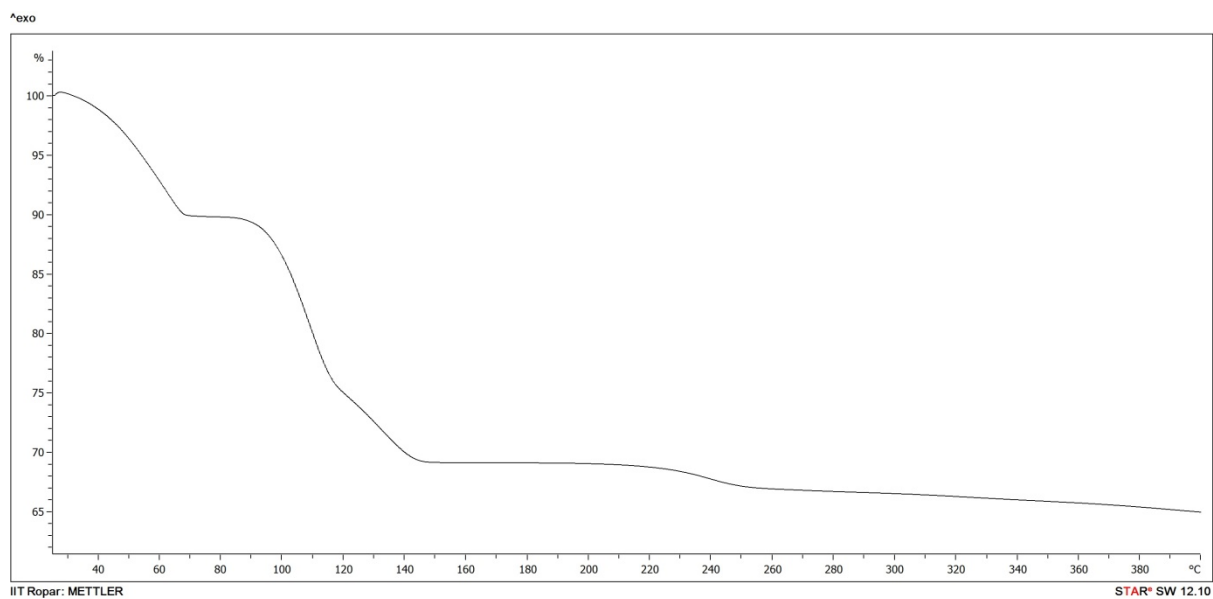

**Figure 10S:** TGA of compound Cu@4a

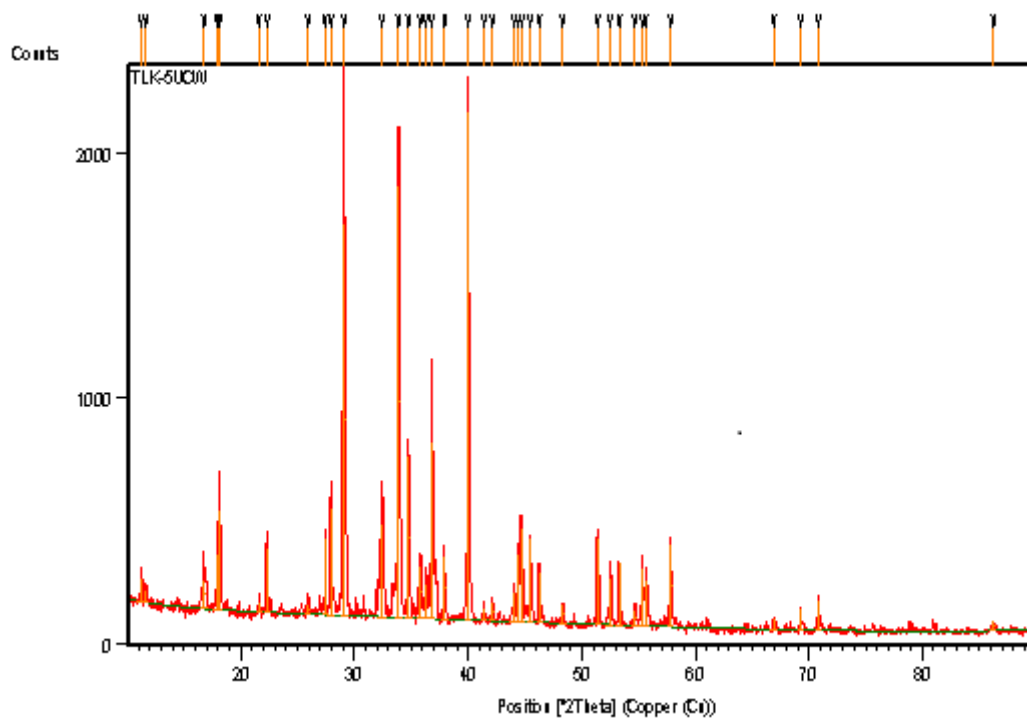

**Figure 11S:** XRD of compound Cu@4a

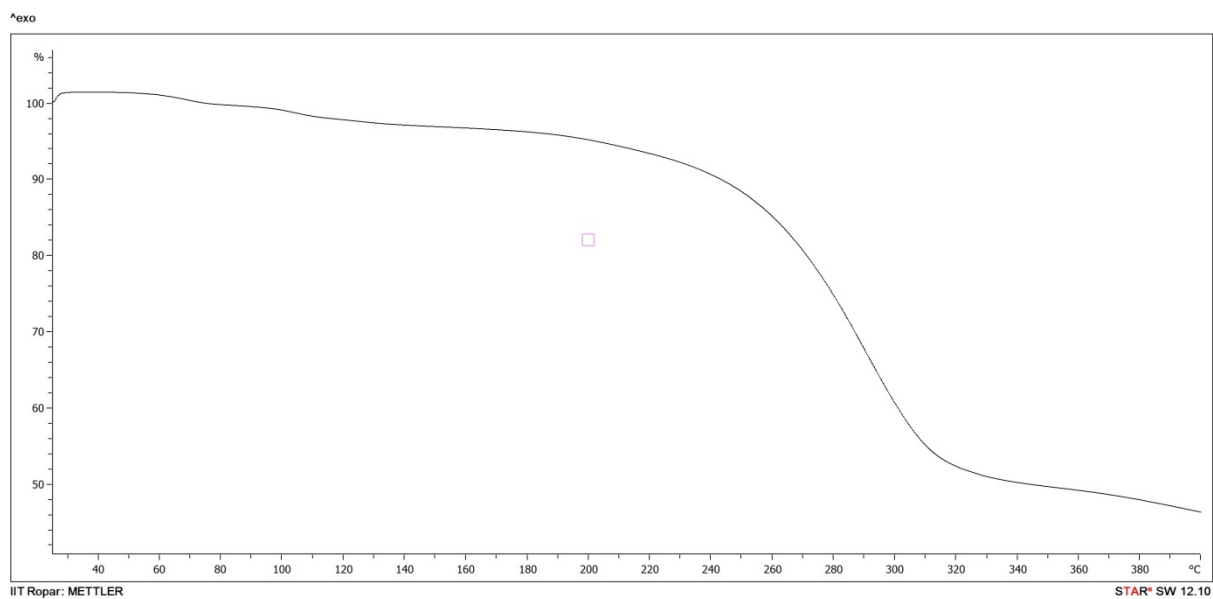

**Figure 12S:** TGA of compound Au@4a

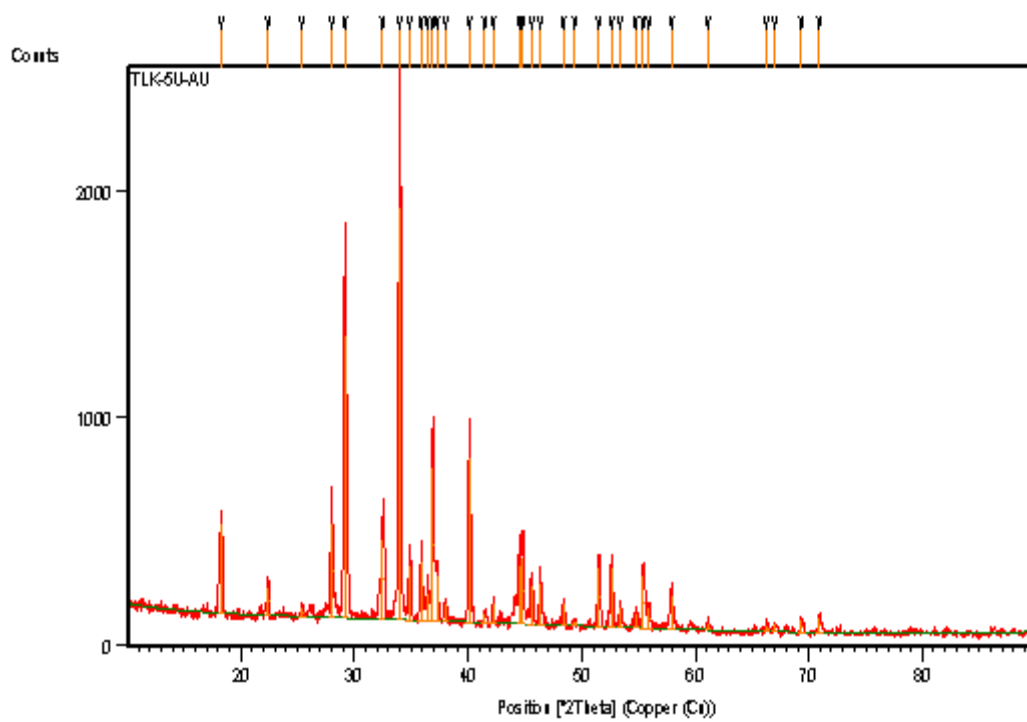

**Figure 13S:** XRD of compound Au@4a
